# Supplementary figures and images for: Shank promotes action potential repolarization by recruiting BK channels to calcium microdomains
Source: eLife journal article supplement (doi:10.7554/elife.75140), 2022-03-10

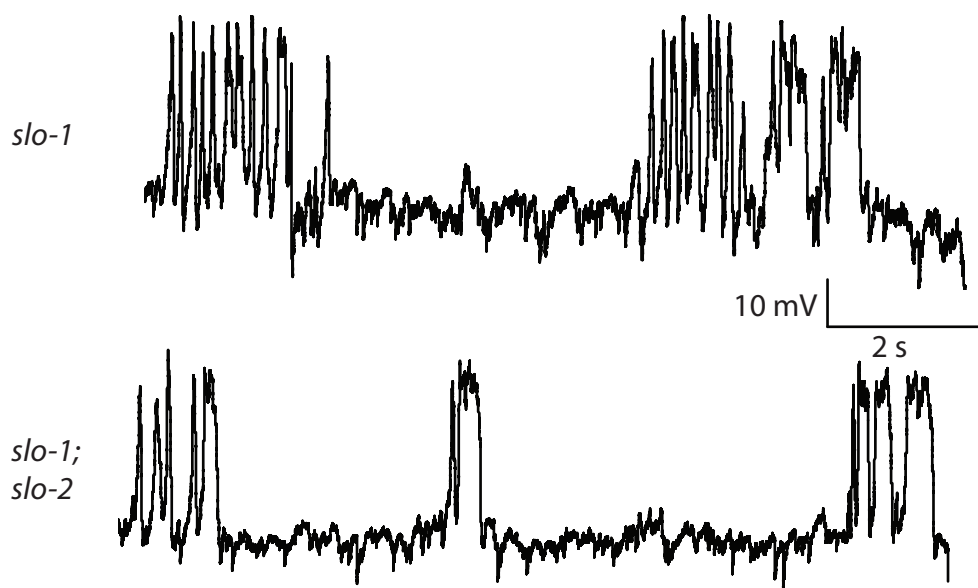

Figure 4 Supplement 1. Gao et al.

Supplement: supp [file elife-75140-supp-v1.zip]

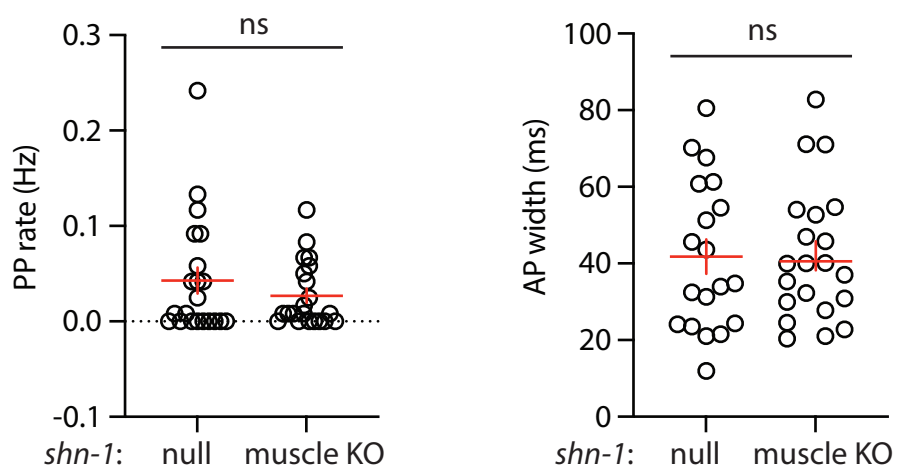

Figure 2 Supplement 2. Gao et al.

Supplement: supp [file elife-75140-supp-v1.zip]

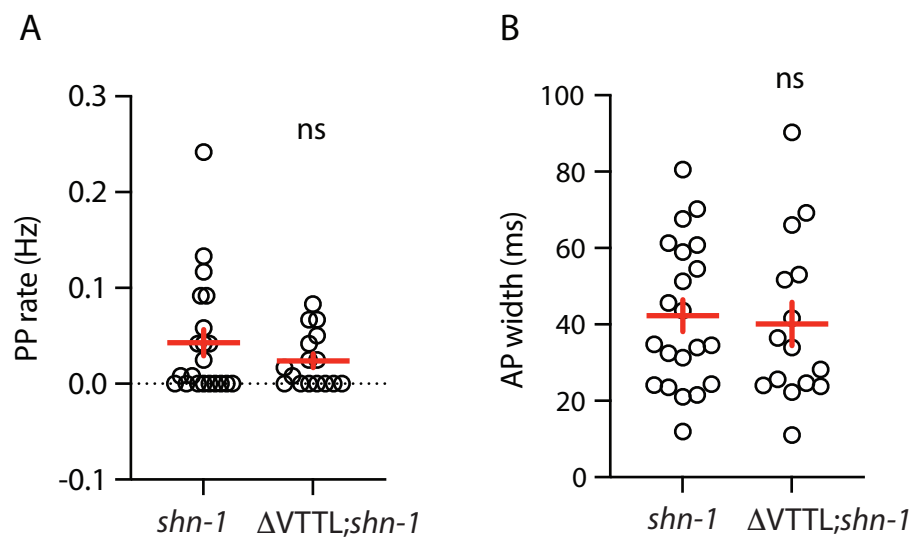

Figure 3 supplement 2. Gao et al.

Supplement: supp [file elife-75140-supp-v1.zip]

**A**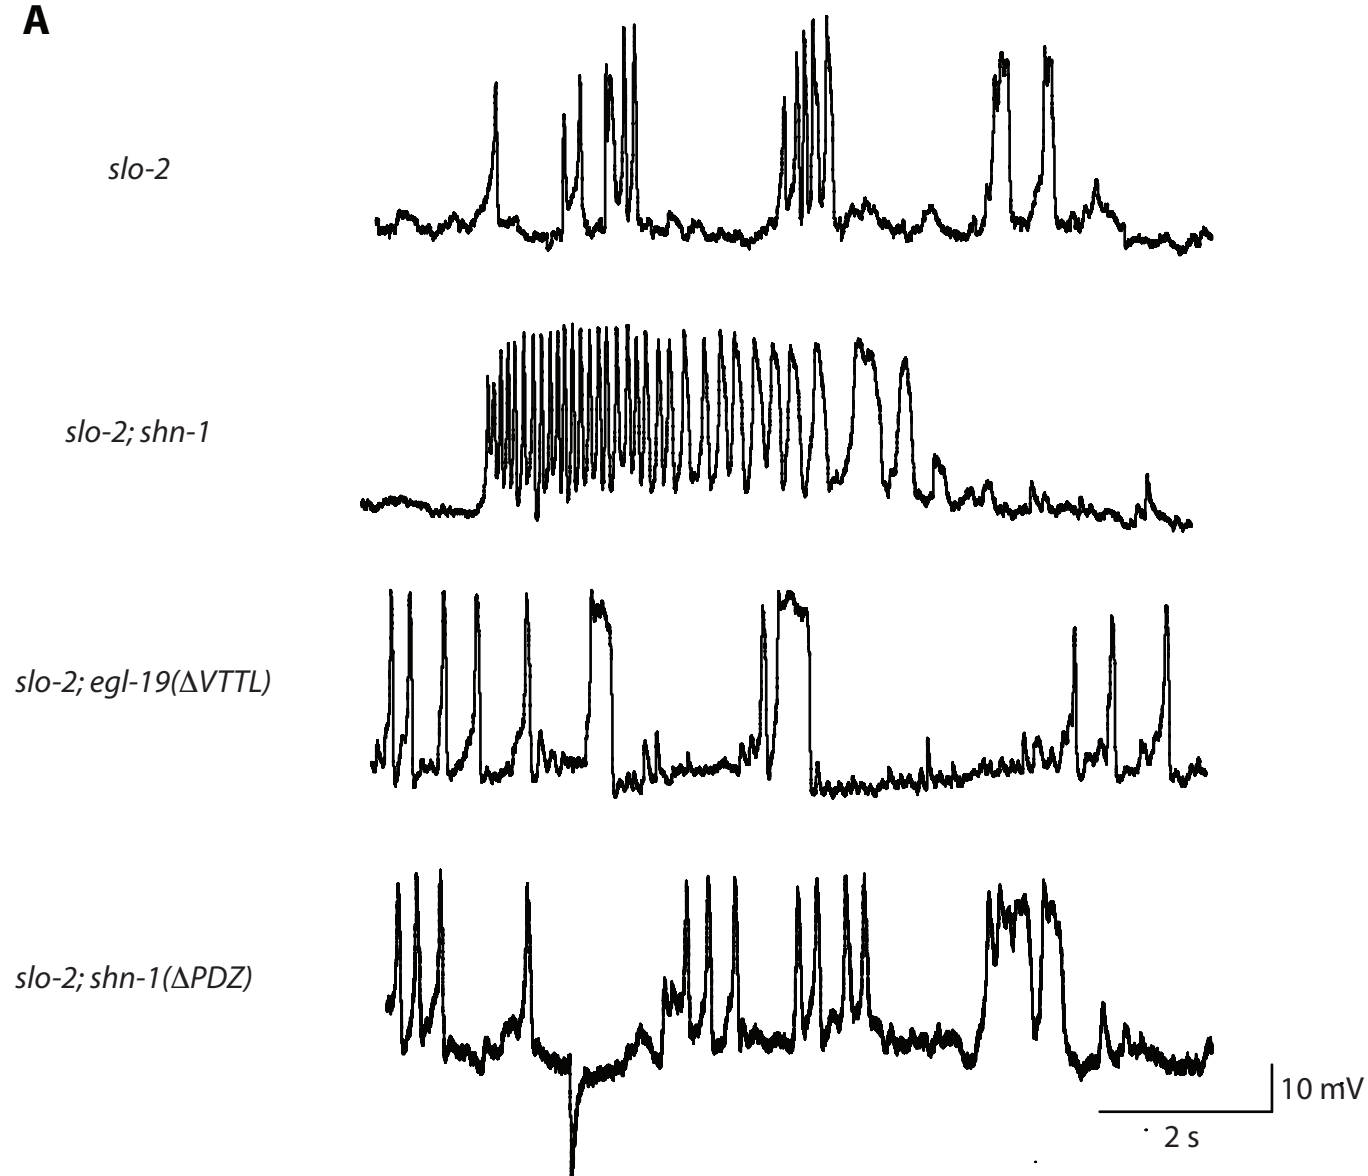**B**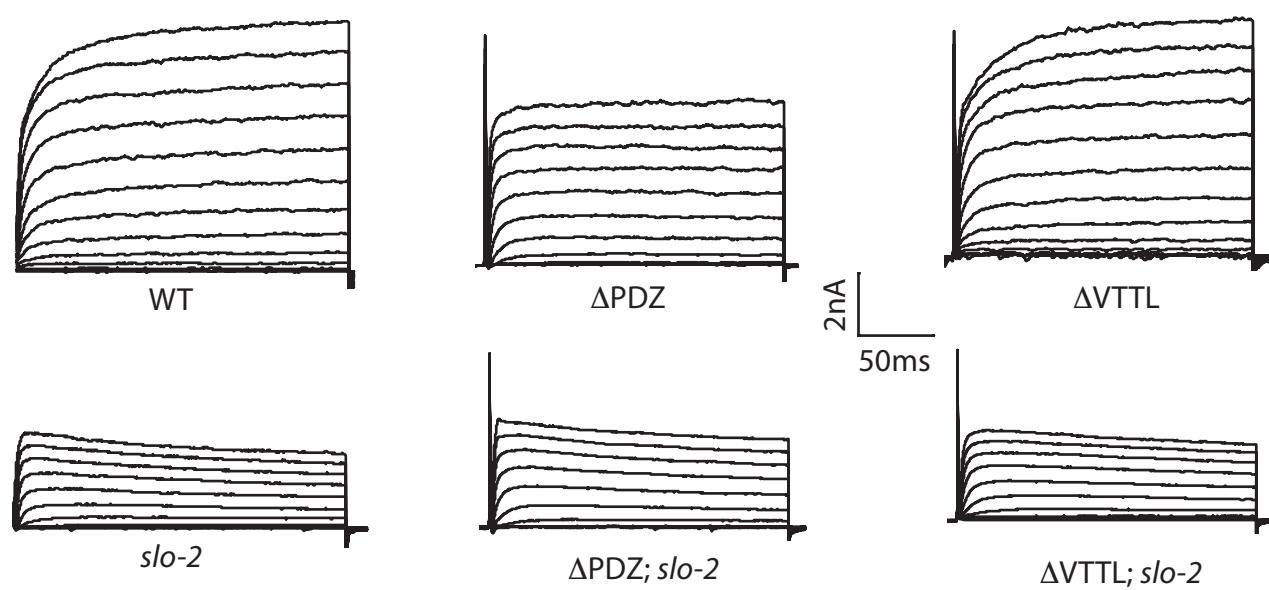

Figure 6 Supplement 1. Gao et al.

Supplement: supp [file elife-75140-supp-v1.zip]

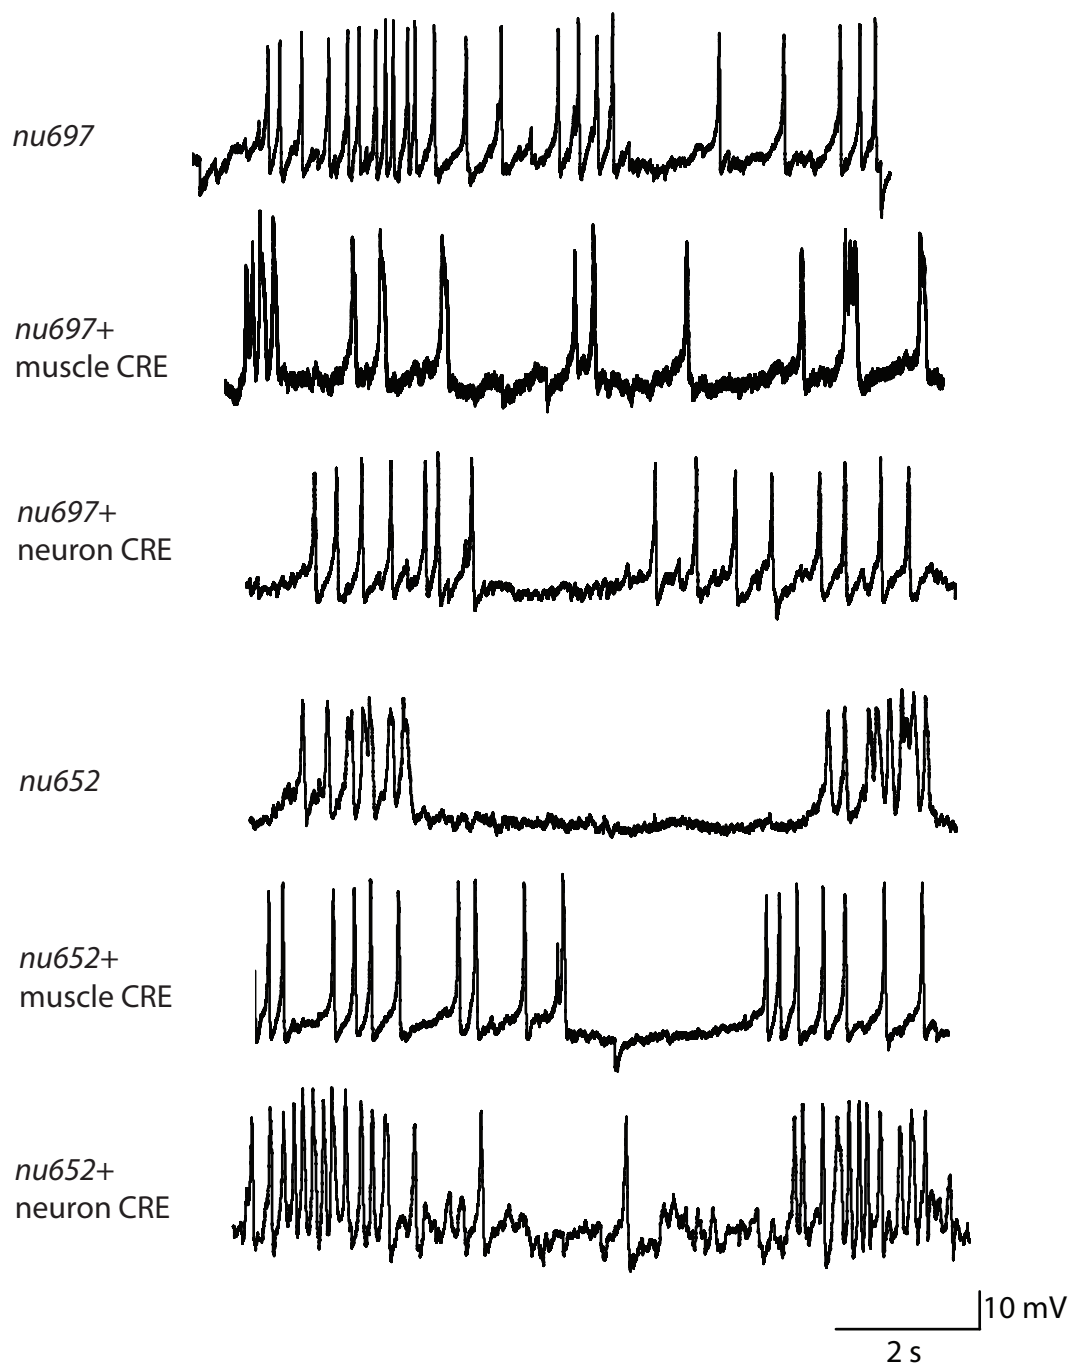

Figure 2 supplement 1. Gao et al.

Supplement: supp [file elife-75140-supp-v1.zip]

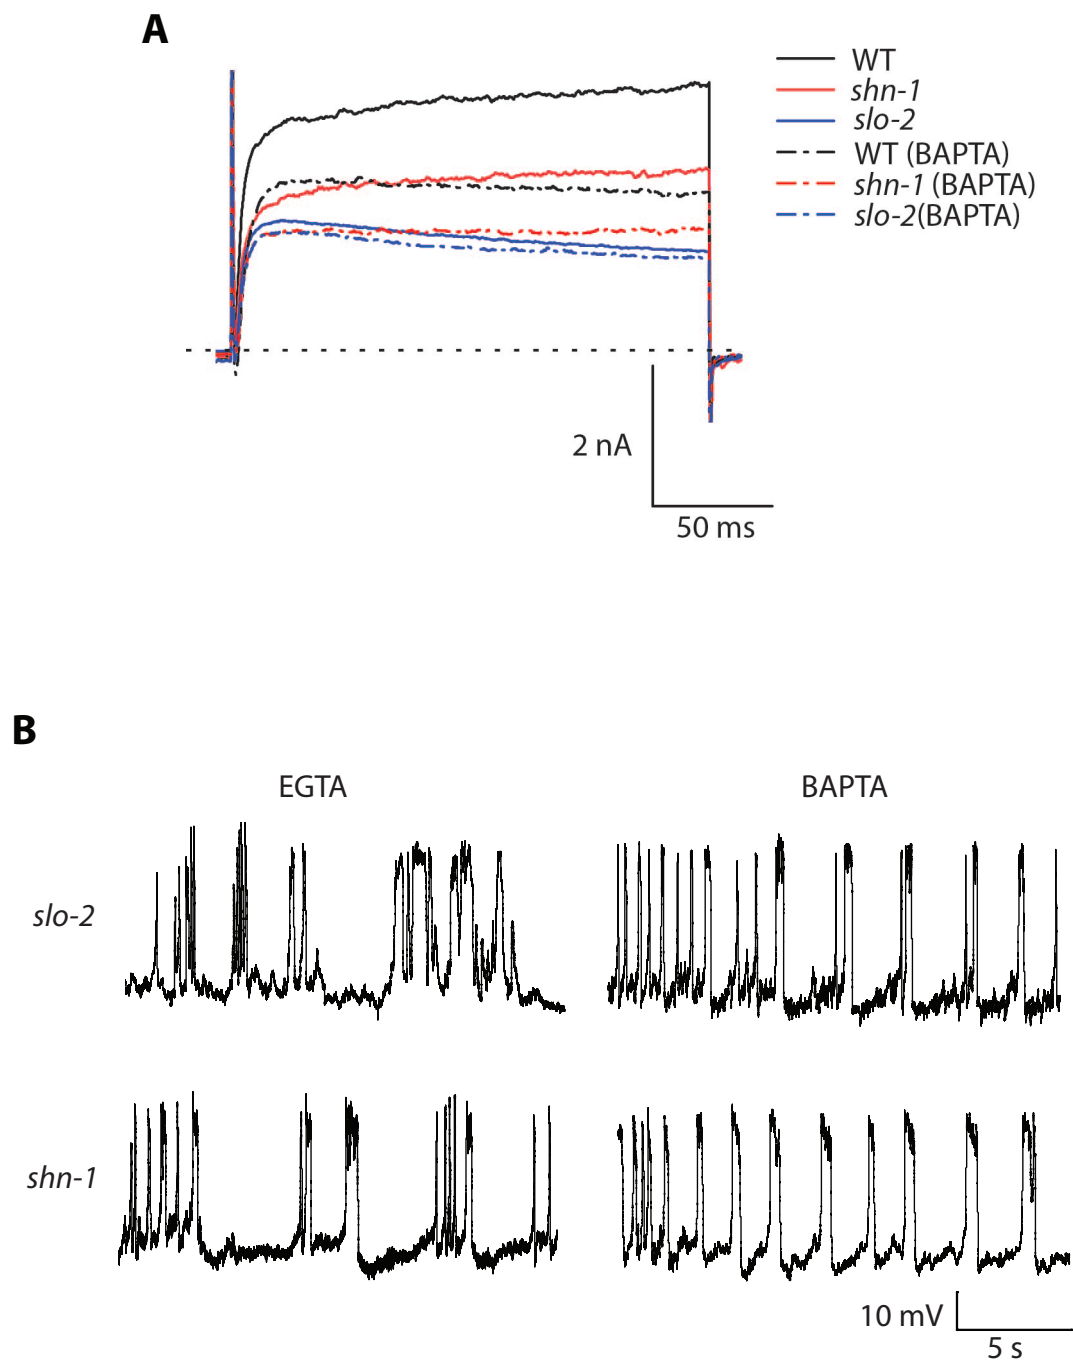

Supplement: supp [file elife-75140-supp-v1.zip]

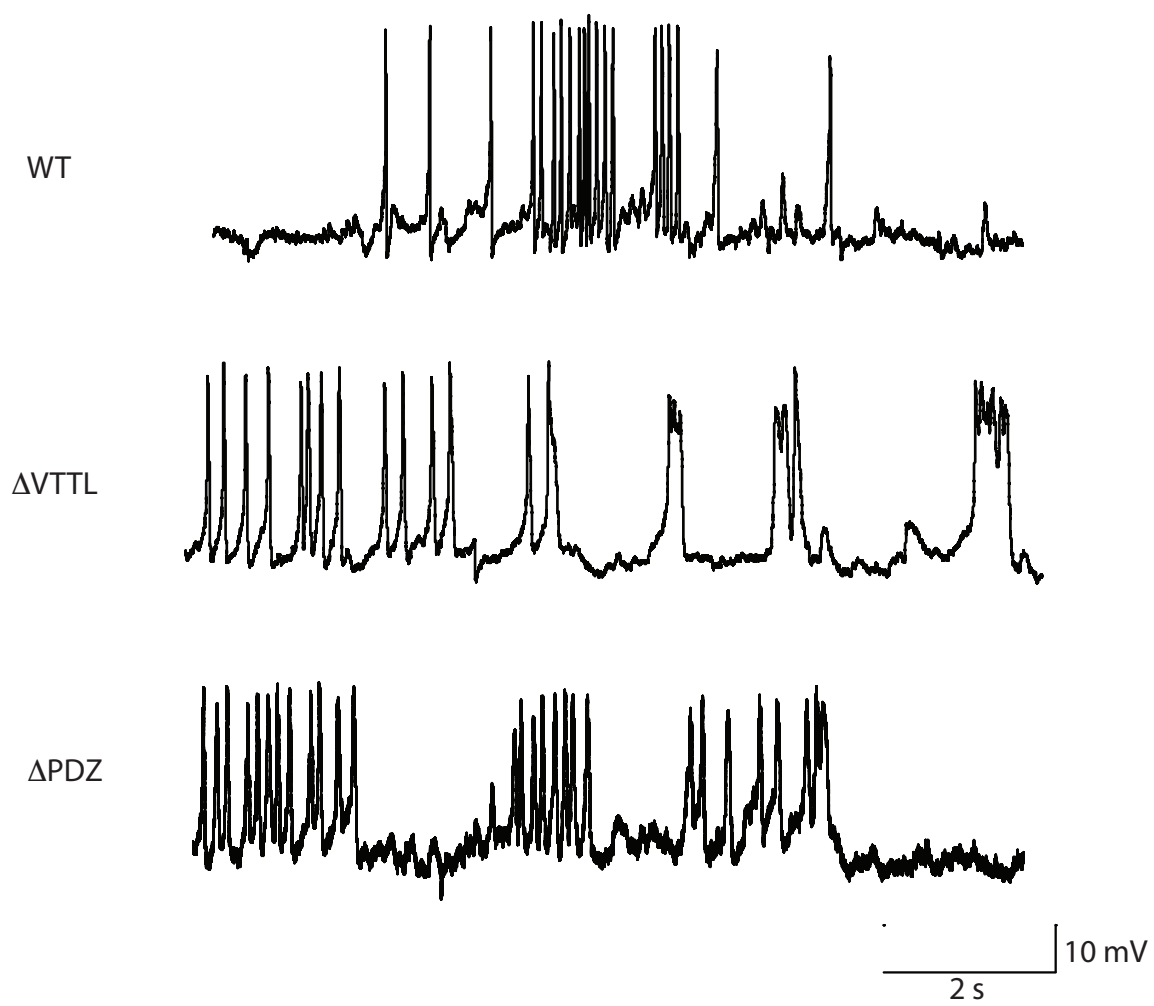

Figure 3 supplement 1. Gao et al.

Supplement: supp [file elife-75140-supp-v1.zip]

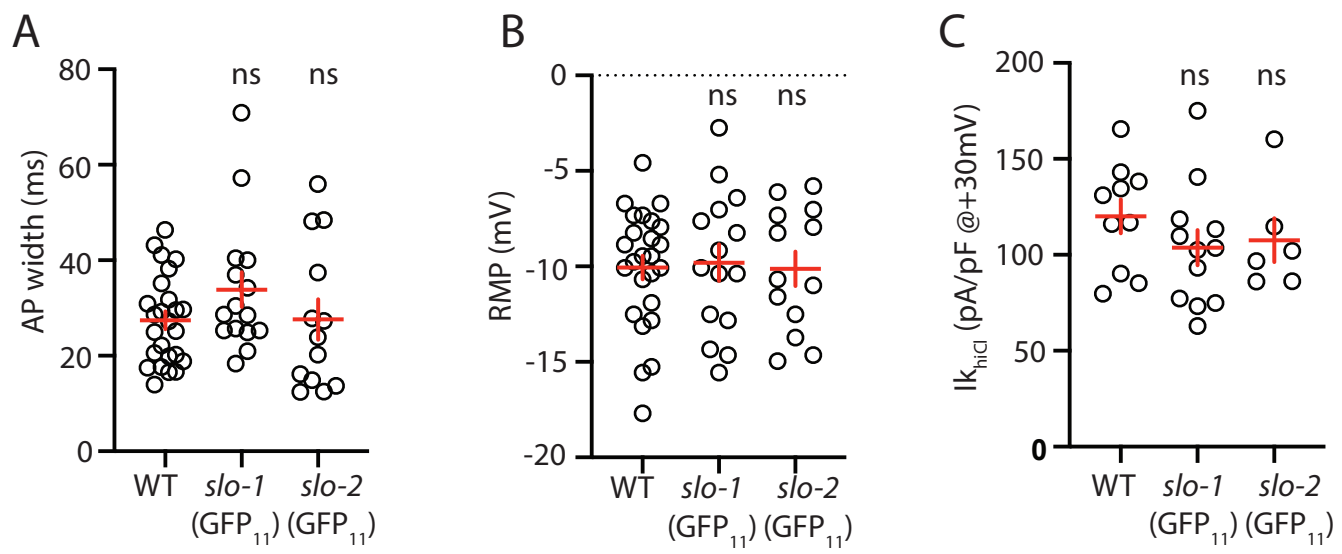

Supplement: supp [file elife-75140-supp-v1.zip]

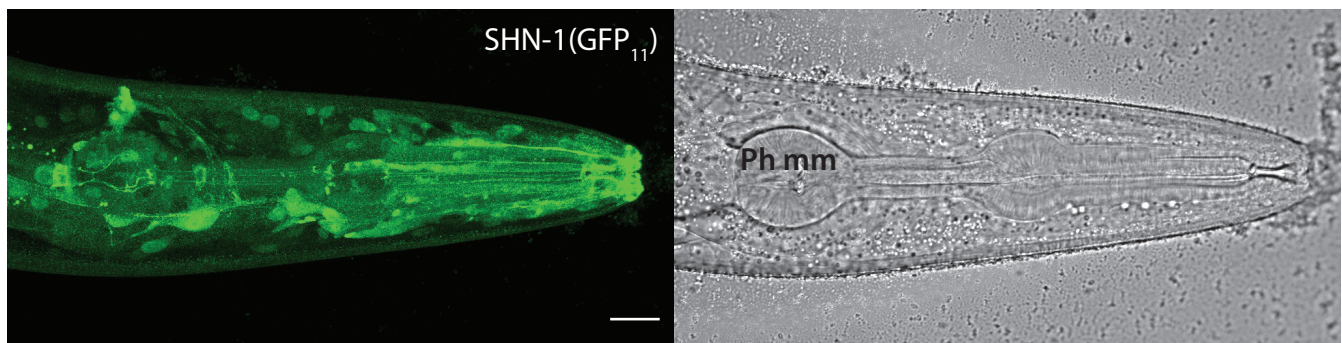

Gao et al, Figure 1, Supplement 1

Supplement: supp [file elife-75140-supp-v1.zip]

A

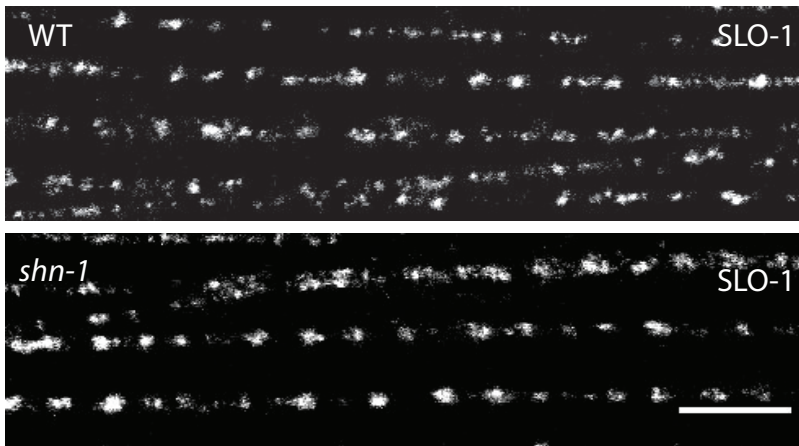

B

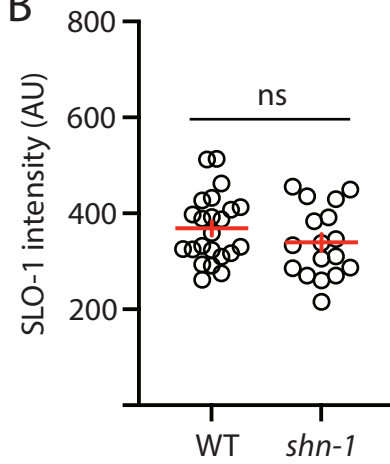

C

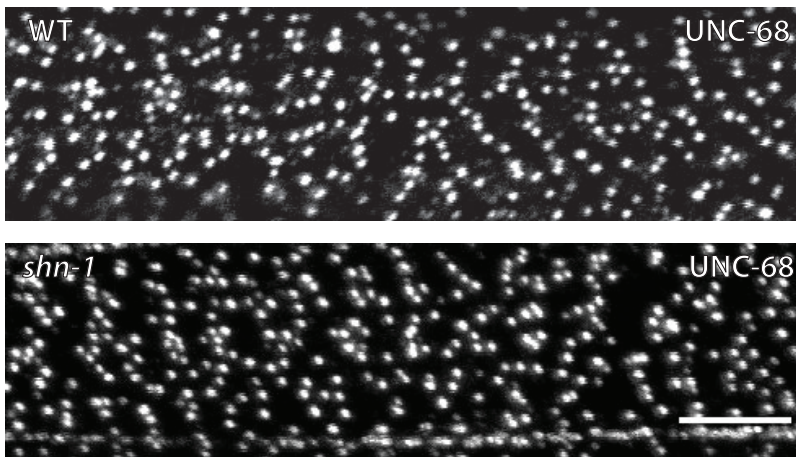

D

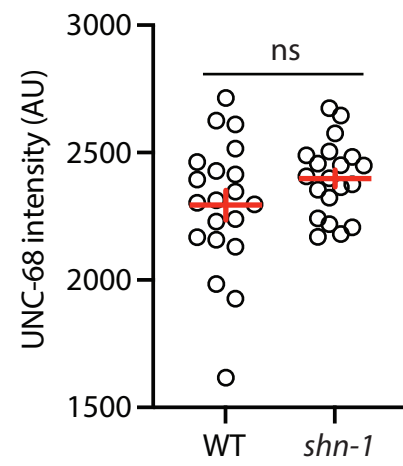

Figure 7 supplement 2. Gao et al.

Supplement: supp [file elife-75140-supp-v1.zip]
